# Supplementary material
Source: Springer Nature journal article supplement (https://www.springermedizin.de/resource/supplementary/12958_2012_990_MOESM3_ESM.pdf/9566516)

**A**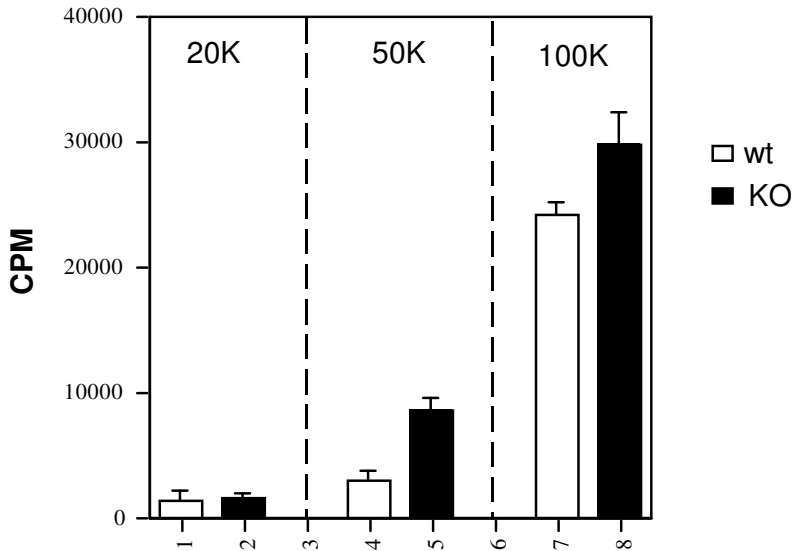**B**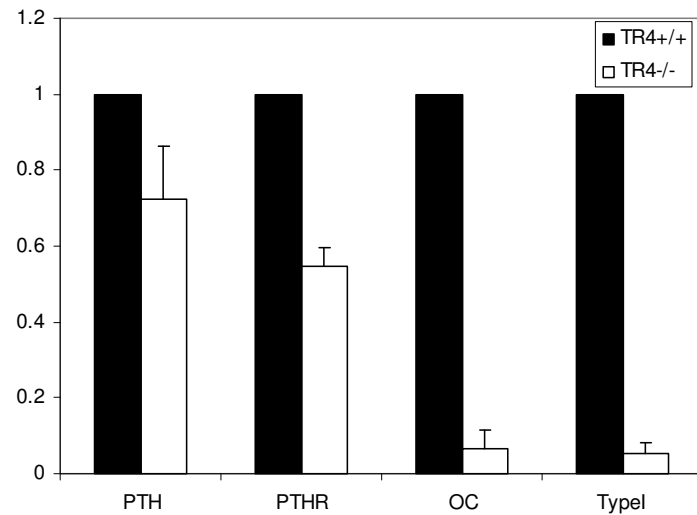**C**Osteocalcin ( $\mu\text{g/ml}$ ):

|          | +/+    | +/-  | -/- |
|----------|--------|------|-----|
| <b>1</b> | 0.618  | 0.28 | UD  |
| <b>2</b> | 0.387  |      | UD  |
| <b>3</b> | 0.3269 |      | UD  |

UD: can not be detected.

Supplement: MOESM3 [file 9566516]
